# Supplementary material for: There is no F in APC: Using physiological fluoride-free solutions for high throughput automated patch clamp experiments
Source: Frontiers journal article supplement (doi:10.3389/fnmol.2022.982316), 2022-08-22
Supplement: downloadfile [file 982316]

## *Supplementary Material*

**Supplementary Table 1:** IC<sub>50</sub> values for tetracaine at different holding potentials (HP) for an average of 4 chips in standard internal solution and 3 chips in fluoride-free internal solution. Single addition of compound to each well was performed and the concentration response curve calculated across multiple wells. Shown are mean ± S.E.M.

| <b>Parameter</b>                            | <b>Standard internal</b> | <b>Fluoride-free internal</b> |
|---------------------------------------------|--------------------------|-------------------------------|
| IC <sub>50</sub> Tetracaine HP -120 mV (μM) | 35.60 ± 9.41             | 41.76 ± 9.29                  |
| IC <sub>50</sub> Tetracaine HP -100 mV (μM) | 14.76 ± 4.43             | 21.28 ± 5.29                  |
| IC <sub>50</sub> Tetracaine HP -80 mV (μM)  | 5.20 ± 1.64              | 10.28 ± 2.49                  |

**Supplementary Table 2:** Success rate, R<sub>Seal</sub> and I<sub>Peak</sub> parameters for CHO cells expressing Nav1.5 at physiological temperature. R<sub>Seal</sub> values > 4 GΩ could not be accurately calculated, therefore only R<sub>Seal</sub> ≤ 4 GΩ were used for the calculation.

| <b>Parameter</b>                                                                   | <b>Standard internal</b> | <b>Fluoride-free internal</b> |
|------------------------------------------------------------------------------------|--------------------------|-------------------------------|
| Success rate (% available wells) R <sub>Seal</sub> ≥ 1 GΩ at start of experiment   | 79.6 ± 4.7 (10 chips)    | 30.0 ± 7.1 (6 chips)          |
| Success rate (% available wells) R <sub>Seal</sub> ≥ 250 MΩ at start of experiment | 88.8 ± 4.5 (10 chips)    | 35.5 ± 9.2 (6 chips)          |
| R <sub>Seal</sub> (GΩ)                                                             | 2.11 ± 0.06 (286)        | 1.41 ± 0.07 (156)             |
| I <sub>Peak</sub> (nA)                                                             | -2.40 ± 0.20 (357)       | -1.61 ± 0.09 (194)            |

**Supplementary Table 3:** Success rate in % for the different channels/cell lines tested with different fluoride free approaches,  $R_{Seal}$  and  $I_{Peak/Tail}$  cut off at  $R_{Seal} > 1 \text{ G}\Omega$  or  $R_{Seal} > 0.25 \text{ G}\Omega$  as indicated. n.d = not done

| Channel/<br>Cell line | Parameter                                                                                    | Fluoride-free internal<br>(K-Gluconate based)                       | Fluoride-free internal<br>(K-Chloride based)                     |
|-----------------------|----------------------------------------------------------------------------------------------|---------------------------------------------------------------------|------------------------------------------------------------------|
| Nav1.5-<br>CHO        | Success rate (% available wells) $R_{Seal} \geq 1 \text{ G}\Omega$ & $I < -100 \text{ pA}$   | Start: $41.9 \pm 9.3$ (17 chips)<br>End: $33.0 \pm 5.7$ (17 chips)  | Start: $37.8 \pm 6.6$ (6 chips)<br>End: $30.2 \pm 4.4$ (6 chips) |
| Nav1.5-<br>CHO        | Success rate (% available wells) $R_{Seal} \geq 250 \text{ M}\Omega$ & $I < -100 \text{ pA}$ | Start: $55.0 \pm 11.7$ (17 chips)<br>End: $46.3 \pm 8.6$ (17 chips) | Start: $57.4 \pm 5.8$ (6 chips)<br>End: $48.9 \pm 6.1$ (6 chips) |
| hERG-<br>CHO          | Success rate (% available wells) $R_{Seal} \geq 1 \text{ G}\Omega$ & $I > 150 \text{ pA}$    | n.d                                                                 | Start: $38.0 \pm 7.1$ (2 chips)<br>End: $32.0 \pm 8.5$ (2 chips) |
| hERG-<br>CHO          | Success rate (% available wells) $R_{Seal} \geq 250 \text{ M}\Omega$ & $I > 150 \text{ pA}$  | n.d                                                                 | Start: $63.5 \pm 9.2$ (2 chips)<br>End: $57.5 \pm 6.4$ (2 chips) |
| hERG-<br>HEK          | Success rate (% available wells) $R_{Seal} \geq 1 \text{ G}\Omega$ & $I > 150 \text{ pA}$    | Start: $35.9 \pm 7.9$ (32 chips)<br>End: $33.6 \pm 7.8$ (32 chips)  | Start: $36.9 \pm 8.3$ (2 chips)<br>End: $32.2 \pm 6.4$ (2 chips) |
| hERG-<br>HEK          | Success rate (% available wells) $R_{Seal} \geq 250 \text{ M}\Omega$ & $I > 150 \text{ pA}$  | Start: $59.0 \pm 8.5$ (32 chips)<br>End: $57.0 \pm 8.8$ (32 chips)  | Start: $47.8 \pm 3.8$ (2 chips)<br>End: $45.3 \pm 7.0$ (2 chips) |

## 1 Supplementary Figures and Tables

For more information on Supplementary Material and for details on the different file types accepted, please see [here](#). Figures, tables, and images will be published under a Creative Commons CC-BY licence and permission must be obtained for use of copyrighted material from other sources (including re-published/adapted/modified/partial figures and images from the internet). It is the responsibility of the authors to acquire the licenses, to follow any citation instructions requested by third-party rights holders, and cover any supplementary charges.

### 1.1 Supplementary Figures

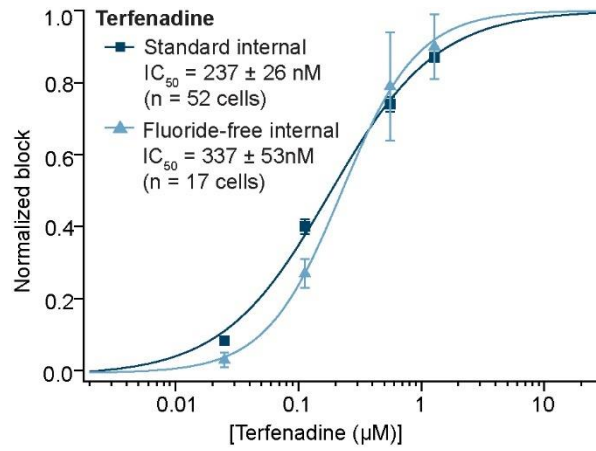

**Supplemental Figure S1:** Concentration response curve for Terfenadine in standard internal solution or fluoride-free solution are shown overlaid.

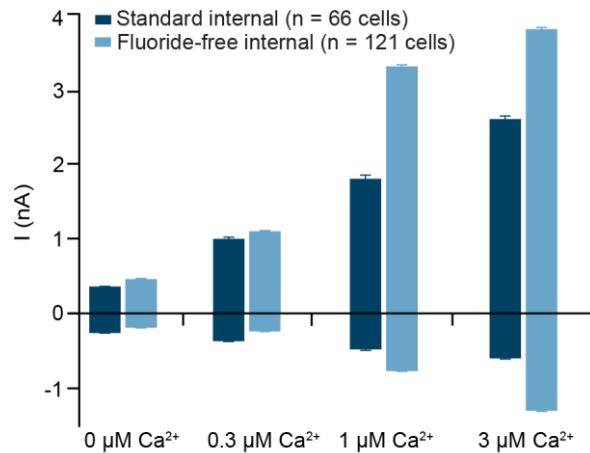

**Supplementary Figure S2.** Mean  $I_{\text{Peak}}$  values observed after applying 0, 0.3, 1 and 3  $\mu\text{M}$  free internal  $\text{Ca}^{2+}$  in standard internal solution or fluoride-free solution at -120 mV (bars below 0 nA) or 60 mV (bars above 0 nA).
